# Supplementary material for: In situ generation of H2O2 using CaO2 as peroxide storage depot for haloperoxidase mimicry with surface-tailored Bi-doped mesoporous CeO2 nanozymes
Source: Royal Society of Chemistry journal article supplement (doi:10.1039/d2nr02575b), 2022-10-24
Supplement: d2nr02575b1.pdf [file d2nr02575b1.pdf]

## ELECTRONIC SUPPLEMENTARY INFORMATION

### ***In situ* Generation of H<sub>2</sub>O<sub>2</sub> Using CaO<sub>2</sub> as Peroxide Storage Depot for Haloperoxidase Mimicry with Surface-Tailored Bi-doped Mesoporous CeO<sub>2</sub> Nanozymes**

Eva Pütz, Ina Tutzschky, Hajo Frerichs, and Wolfgang Tremel\*

Johannes Gutenberg-Universität Mainz, Department Chemie, Duesbergweg 10-14, D-55128 Mainz, Germany

Electronic supplementary information (ESI) available. See DOI: [xx.yyyy/zzzz zzzzss](#)

**Keywords:** mesoporous ceria, Bi-doping, haloperoxidase enzyme mimic, peroxide storage, surface chemistry

#### Table of contents

| Figure  | Title                                                                                                                                                                                                                                                        | Page |
|---------|--------------------------------------------------------------------------------------------------------------------------------------------------------------------------------------------------------------------------------------------------------------|------|
| Fig. S1 | SEM image of PES beads at different magnifications.                                                                                                                                                                                                          | S2   |
| Fig. S2 | IR spectra of the starting materials PES, PVDF and PVP and of PES/PVDF beads after coagulation.                                                                                                                                                              | S3   |
| Fig. S3 | FTIR spectra of coagulated PES (A) and PVDF (B) composites.                                                                                                                                                                                                  | S4   |
| Fig. S4 | FTIR spectra of coagulated PES composites with CaO <sub>2</sub> and BiCe (A) and PVDF composites with CaO <sub>2</sub> and BiCe (B).                                                                                                                         | S5   |
| Fig. S5 | UV/Vis spectra of a phenol red assay in the presence of PES, PVDF, PES-BiCe, and PVDF-BiCe composites, PES-CaO <sub>2</sub> and PVDF-CaO <sub>2</sub> composites and PES-BiCe-CaO <sub>2</sub> and PVDF-BiCe-CaO <sub>2</sub> composites after 0 h and 24 h. | S6   |

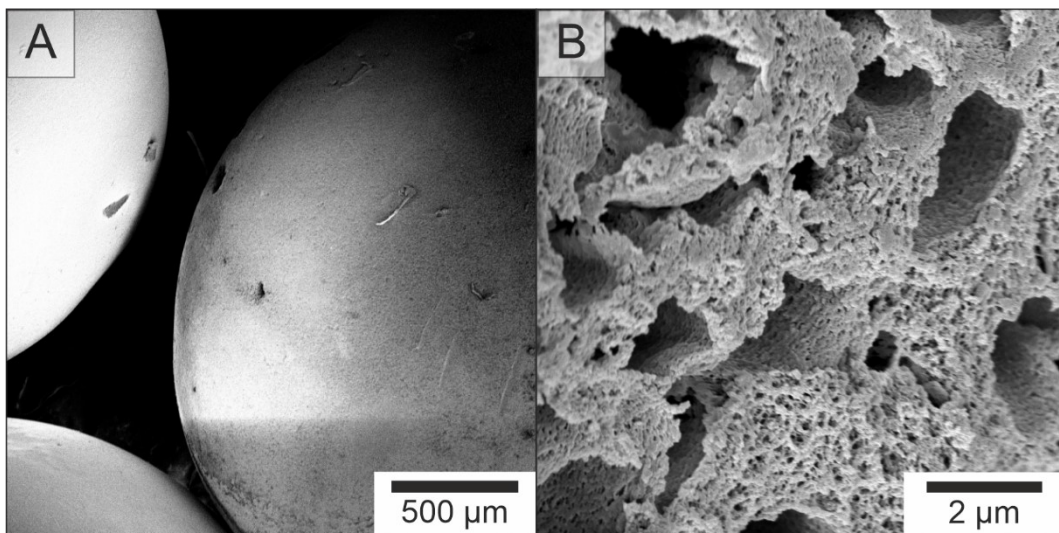

**Fig. S1.** SEM image of PES beads at different magnifications.

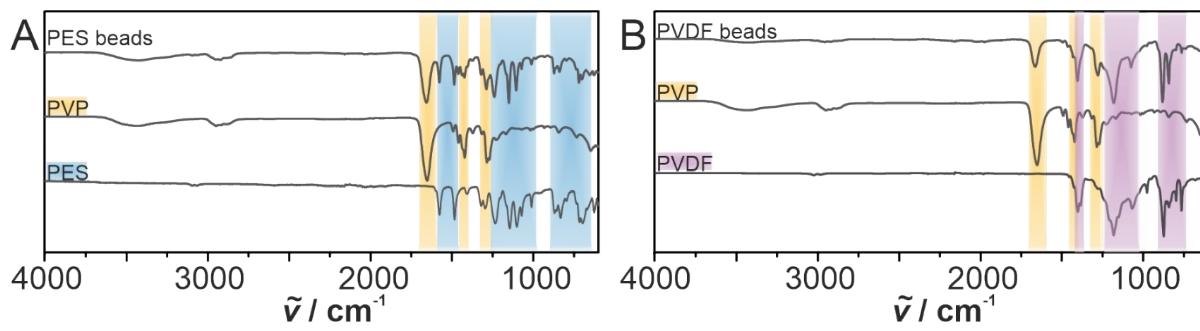

**Fig. S2.** IR spectra of the starting materials PES, PVDF and PVP and of PES/PVDF beads after coagulation.

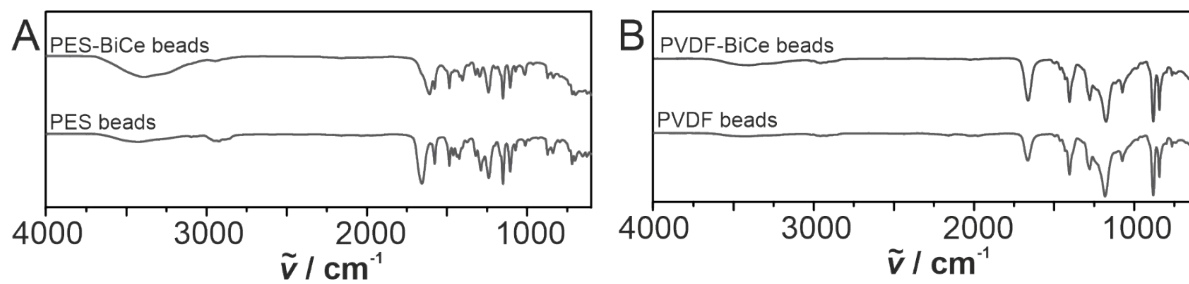

**Fig. S3.** FTIR spectra of coagulated PES (A) and PVDF (B) composites.

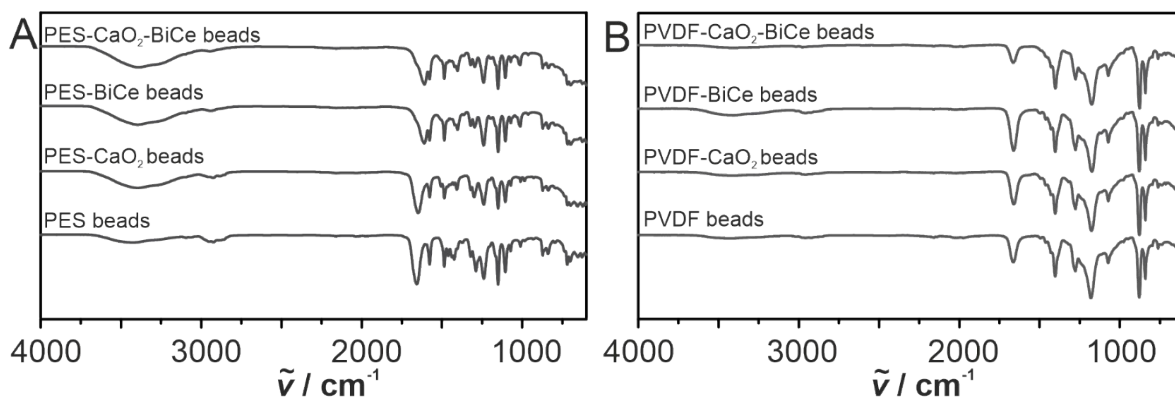

**Fig. S4.** FTIR spectra of coagulated PES composites with CaO<sub>2</sub> and BiCe (A) and PVDF composites with CaO<sub>2</sub> and BiCe (B).

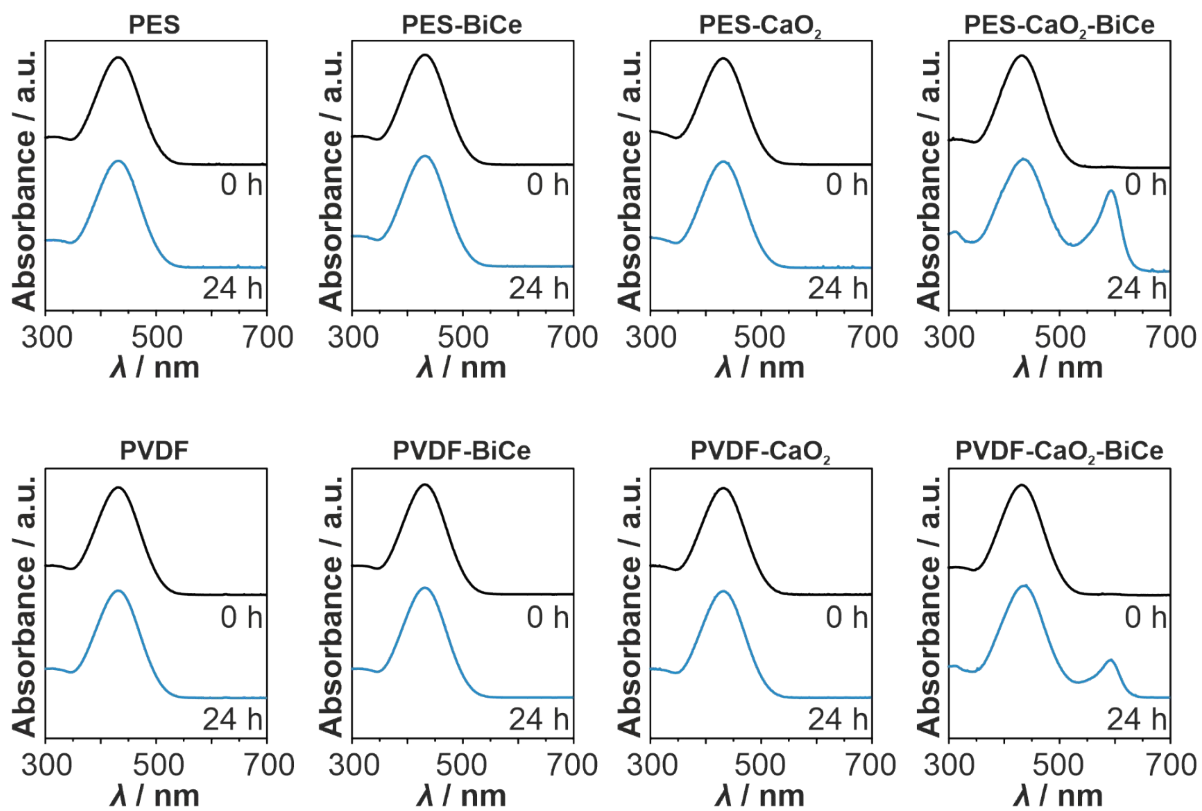

**Fig. S5.** UV/Vis spectra of a phenol red assay in the presence of PES, PVDF, PES-BiCe (control 1) and PVDF-BiCe composites, PES-CaO<sub>2</sub> and PVDF-CaO<sub>2</sub> composites (control 2) and PES-BiCe-CaO<sub>2</sub> and PVDF-BiCe-CaO<sub>2</sub> composites after 0 h and 24 h.
